# Supplementary material for: Correlation of population mortality of COVID-19 and testing coverage: a comparison among 36 OECD countries
Source: PubMed Central journal article supplement (PMC7804083; doi:10.1017/s0950268820003076), 2020-12-28
Supplement: S0950268820003076sup001.pdf [file S0950268820003076sup001.pdf]

## Appendix

**eFigure 1.** Scatter plots between two testing metrics and proportion of critical cases among the 36 OECD countries and Taiwan. The relationship between proportion of critical cases and coverage **(A)**. The relationship between proportion of critical cases and number of tests per 1 million people **(B)**

**eFigure 1A.**

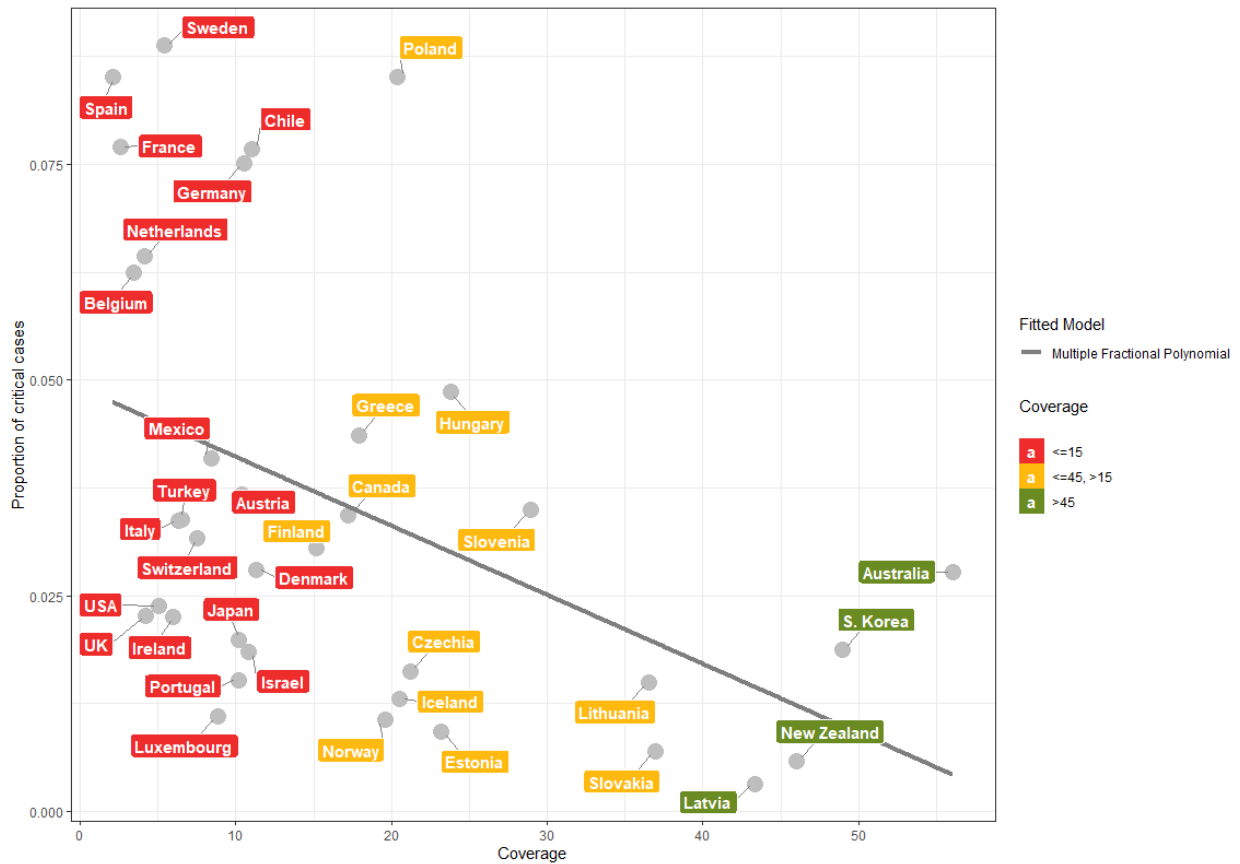

Formula:  $y = -0.07998 * x^{-1} + 0.0491295$

Spearman correlation: -0.51

P-value: 0.001659

eFigure 1B.

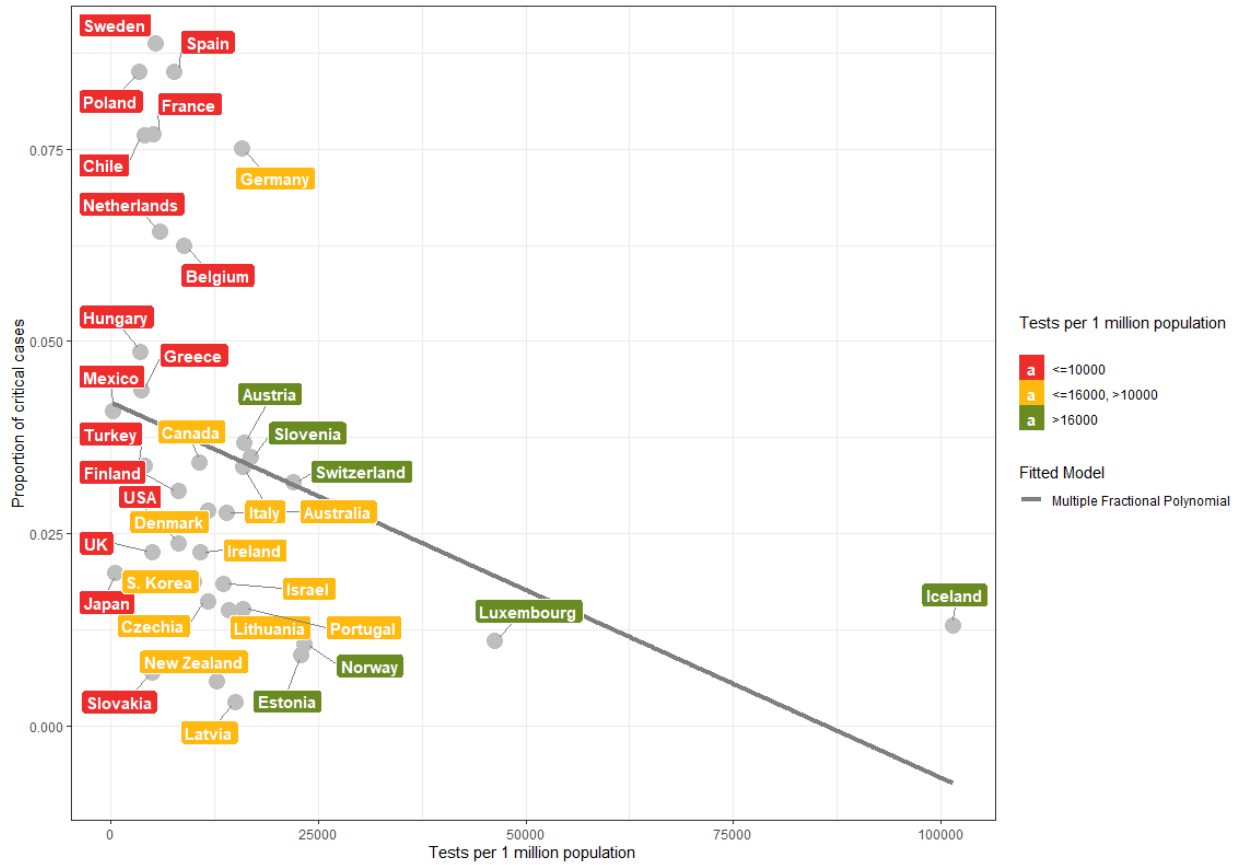

Formula:  $y = -0.000488 * x^{-1} + 0.0421$

Spearman correlation: -0.50

P-value: 0.001883

eTable 1: Categorization of non-pharmacologic interventions to prevent COVID-19 spread

| Level of Non-Pharmacological Intervention | Intervention Measures                                                                                  |
|-------------------------------------------|--------------------------------------------------------------------------------------------------------|
| 1                                         | Case isolation, home quarantine for suspected cases or exposed individuals, and wearing masks          |
| 2                                         | Population-based social distancing such as closing schools, stadiums, churches and other public venues |
| 3                                         | Lockdown of an endemic area or an entire city.                                                         |
